# Supplementary material for: From magmatic flow to hydrothermal collapse: AMS constraints on structural and alteration dynamics in the Shadan Au-rich porphyry deposit, South Khorasan, Eastern Iran
Source: Research Square preprint supplement (doi:10.21203/rs.3.rs-8728700/v1), 2026-02-20
Supplement: Supplementary file 1 [file 0b4e52c92468c7584f27fe0b.xlsx]

## Sheet: Sheet1
				MSH3									MSh3					MSH3						MSh4
		Point	68	146	147	148	149	150	154	156	158	160	172	173	175	176	177	178	180	181	185	199	223	281	282	283	312
		CaO	51.028	0	0	0	0	0	0	0	0	0	52.729	52.866	53.1	54.787	55.37	0	0	0	0	0	0	27.127	37.879	28.331	43.262
		MgO	0.001	0	0.01	0.027	0.048	0	0	0.067	0.067	0.061	0	0.023	0.006	0	0	0.027	0.096	0.109	0.038	0.021	0.038	12.115	9.477	13.081	2.291
		FeO	0.214	59.423	58.116	58.578	59.352	59.472	58.203	57.932	58.525	59.634	0.085	0.14	0.079	0.067	0.128	59.696	60.14	58.997	59.06	59.754	60.051	8.648	6.726	10.203	0.761
		MnO	0.101	0.044	0	0	0	0.032	0	0.108	0	0	0	0.05	0.029	0.051	0.029	0	0	0	0.108	0.038	0.019	0.366	0.241	0.491	0.172
		Total	51.806	59.604	58.317	58.85	59.552	59.795	58.578	58.792	59.026	60.866	53.735	53.519	53.845	55.554	56.012	59.852	60.33	59.567	59.551	59.894	60.621	48.748	54.516	52.539	46.587
		name	calcite	Siderite	Siderite	Siderite	Siderite	Siderite	Siderite	Siderite	Siderite	Siderite	calcite	calcite	calcite	calcite	calcite	Siderite	Siderite	Siderite	Siderite	Siderite	Siderite	Dolomite	Ankerite	Ankerite	Mg dolomite
