# Supplementary material for: From magmatic flow to hydrothermal collapse: AMS constraints on structural and alteration dynamics in the Shadan Au-rich porphyry deposit, South Khorasan, Eastern Iran
Source: Research Square preprint supplement (doi:10.21203/rs.3.rs-8728700/v1), 2026-02-20
Supplement: Supplementary file 2 [file 68954863e3d1770a4ff7c54e.xlsx]

## Sheet: Sheet1
	MSH1																					MSh2
Point	29	30	31	32	33	34	35	36	37	44	45	46	47	48	52	53	54	55	56	57	58	64	65	66	74	75	76	77	78	84	88	89	90	91	92	94	95	96	97	98	125	126	130	135	136	137	138	140	141
TiO2	0	1.655	0.08	0.334	0	0.048	0	0.238	0.063	0	0.143	0	1.068	0.032	0.158	0.555	0.095	0	1.11	0	0	0.016	0.158	0.174	0.142	0.047	0.048	0	0.095	0	1.588	0.079	0.301	0.142	0.206	0.063	0.079	0.079	0.016	0.174	0.142	0.19	0.428	0.729	0.412	0.063	0.19	0.127	0.032
Al2O3	0.11	0.152	0.699	0.224	0.029	0.186	0.283	0.358	0.297	0.281	0.156	0.286	3.731	1.973	0.096	0.397	0.201	0.16	0.113	0.074	0.123	0.151	0.17	0.073	0.136	0.288	0.25	7.243	0.165	0.125	0.169	0.33	0.149	0.175	0.404	0.077	0.028	0.168	0.016	0.105	0.122	0.083	0.274	0.275	0.24	0.138	0.098	0.24	0.168
FeO	89.822	89.052	88.248	89.91	88.388	89.143	88.555	89.676	89.576	89.198	89.742	87.886	79.004	82.432	91.492	86.032	87.458	88.779	88.554	91.421	88.878	91.13	90	87.248	91.242	91.053	88.67	68.445	89.757	90.178	89.932	89.213	88.79	89.968	88.954	88.693	89.529	90.637	88.122	88.624	90.973	90.994	90.424	90.433	91.439	91.001	89.776	89.758	89.554
MnO	0.025	0.07	0.115	0.077	0.115	0.172	0.057	0.096	0.045	0.127	0.14	0.006	0.206	0.07	0.203	0.083	0.006	0.032	0.407	0.127	0	0.064	0.045	0.076	0.064	0.083	0	0.117	0.045	0	0.115	0.006	0.057	0.045	0.089	0.006	0.083	0	0.159	0.095	0.006	0.032	0.076	0.083	0.134	0.089	0.171	0.089	0.076
MgO	0.033	0.012	0.01	0	0.029	0	0	0.023	0	0	0	0.035	2.04	0.234	0.025	0.046	0.017	0	0.015	0	0	0.029	0	0.054	0	0.056	0.084	2.428	0.044	0.027	0.032	0	0.077	0	0.029	0.023	0	0	0	0.063	0.021	0.031	0	0	0.044	0	0	0	0
TiO2	0	0.0207189	0.00100152	0.00418133	0	0.00060091	0	0.00297951	0.000788695	0	0.00179021	0	0.0133703	0.000400607	0.001978	0.00694803	0.0011893	0	0.0138961	0	0	0.000200303	0.001978	0.0021783	0.00177769	0.000588391	0.00060091	0	0.0011893	0	0.0198801	0.000988998	0.00376821	0.00177769	0.00257891	0.000788695	0.000988998	0.000988998	0.000200303	0.0021783	0.00177769	0.0023786	0.00535812	0.00912633	0.00515781	0.000788695	0.0023786	0.00158991	0.000400607
Al2O3	0.00107884	0.00149076	0.00685554	0.00219691	0.000284422	0.00182422	0.00277556	0.00351114	0.00291287	0.00275595	0.00152999	0.00280499	0.0365923	0.0193505	0.000941534	0.00389363	0.00197134	0.00156922	0.00110826	0.000725766	0.00120634	0.00148095	0.0016673	0.000715958	0.00133384	0.0028246	0.00245191	0.0710368	0.00161826	0.00122596	0.00165749	0.00323652	0.00146134	0.00171634	0.00396229	0.000755188	0.000274614	0.00164768	0.000156922	0.0010298	0.00119653	0.000814034	0.00268729	0.0026971	0.00235383	0.00135345	0.000961149	0.00235383	0.00164768
FeO	1.25019	1.23948	1.22829	1.25142	1.23024	1.24074	1.23256	1.24816	1.24677	1.24151	1.24908	1.22325	1.09962	1.14734	1.27344	1.19744	1.21729	1.23568	1.23255	1.27245	1.23706	1.2684	1.25267	1.21437	1.26996	1.26733	1.23416	0.952657	1.24929	1.25515	1.25173	1.24172	1.23583	1.25223	1.23811	1.23448	1.24612	1.26154	1.22653	1.23352	1.26622	1.26651	1.25857	1.2587	1.2727	1.2666	1.24955	1.2493	1.24646
MnO	0.000352423	0.000986784	0.00162115	0.00108546	0.00162115	0.00242467	0.000803524	0.0013533	0.000634361	0.00179031	0.00197357	8.45815e-05	0.00290396	0.000986784	0.00286167	0.00117004	8.45815e-05	0.000451101	0.00573744	0.00179031	0	0.000902203	0.000634361	0.00107137	0.000902203	0.00117004	0	0.00164934	0.000634361	0	0.00162115	8.45815e-05	0.000803524	0.000634361	0.00125463	8.45815e-05	0.00117004	0	0.00224141	0.00133921	8.45815e-05	0.000451101	0.00107137	0.00117004	0.00188899	0.00125463	0.00241057	0.00125463	0.00107137
MgO	0.000818769	0.000297734	0.000248112	0	0.000719524	0	0	0.000570657	0	0	0	0.000868392	0.0506148	0.00580582	0.00062028	0.00114131	0.00042179	0	0.000372168	0	0	0.000719524	0	0.0013398	0	0.00138943	0.00208414	0.0602416	0.00109169	0.000669902	0.000793958	0	0.00191046	0	0.000719524	0.000570657	0	0	0	0.0015631	0.000521035	0.000769147	0	0	0.00109169	0	0	0	0
Total	1.25244	1.26297	1.23801	1.25888	1.23286	1.24559	1.23614	1.25658	1.25111	1.24606	1.25438	1.22701	1.2031	1.17388	1.27984	1.2106	1.22096	1.2377	1.25366	1.27497	1.23826	1.2717	1.25695	1.21967	1.27397	1.2733	1.2393	1.08558	1.25382	1.25705	1.27568	1.24603	1.24377	1.25636	1.24663	1.23668	1.24855	1.26418	1.22913	1.23963	1.26979	1.27092	1.26769	1.27169	1.28319	1.27	1.2553	1.2545	1.24958
TiO2	0	0.0414378	0.00200303	0.00836267	0	0.00120182	0	0.00595903	0.00157739	0	0.00358042	0	0.0267405	0.000801214	0.00395599	0.0138961	0.0023786	0	0.0277921	0	0	0.000400607	0.00395599	0.0043566	0.00355539	0.00117678	0.00120182	0	0.0023786	0	0.0397602	0.001978	0.00753642	0.00355539	0.00515781	0.00157739	0.001978	0.001978	0.000400607	0.0043566	0.00355539	0.00475721	0.0107162	0.0182527	0.0103156	0.00157739	0.00475721	0.00317982	0.000801214
Al2O3	0.00323652	0.00447229	0.0205666	0.00659074	0.000853265	0.00547266	0.00832669	0.0105334	0.00873861	0.00826784	0.00458998	0.00841496	0.109777	0.0580514	0.0028246	0.0116809	0.00591401	0.00470767	0.00332479	0.0021773	0.00361902	0.00444286	0.0050019	0.00214787	0.00400152	0.0084738	0.00735573	0.21311	0.00485478	0.00367787	0.00497247	0.00970957	0.00438402	0.00514901	0.0118869	0.00226557	0.000823842	0.00494305	0.000470767	0.00308941	0.0035896	0.0024421	0.00806188	0.00809131	0.0070615	0.00406036	0.00288345	0.0070615	0.00494305
FeO	1.25019	1.23948	1.22829	1.25142	1.23024	1.24074	1.23256	1.24816	1.24677	1.24151	1.24908	1.22325	1.09962	1.14734	1.27344	1.19744	1.21729	1.23568	1.23255	1.27245	1.23706	1.2684	1.25267	1.21437	1.26996	1.26733	1.23416	0.952657	1.24929	1.25515	1.25173	1.24172	1.23583	1.25223	1.23811	1.23448	1.24612	1.26154	1.22653	1.23352	1.26622	1.26651	1.25857	1.2587	1.2727	1.2666	1.24955	1.2493	1.24646
MnO	0.000352423	0.000986784	0.00162115	0.00108546	0.00162115	0.00242467	0.000803524	0.0013533	0.000634361	0.00179031	0.00197357	8.45815e-05	0.00290396	0.000986784	0.00286167	0.00117004	8.45815e-05	0.000451101	0.00573744	0.00179031	0	0.000902203	0.000634361	0.00107137	0.000902203	0.00117004	0	0.00164934	0.000634361	0	0.00162115	8.45815e-05	0.000803524	0.000634361	0.00125463	8.45815e-05	0.00117004	0	0.00224141	0.00133921	8.45815e-05	0.000451101	0.00107137	0.00117004	0.00188899	0.00125463	0.00241057	0.00125463	0.00107137
MgO	0.000818769	0.000297734	0.000248112	0	0.000719524	0	0	0.000570657	0	0	0	0.000868392	0.0506148	0.00580582	0.00062028	0.00114131	0.00042179	0	0.000372168	0	0	0.000719524	0	0.0013398	0	0.00138943	0.00208414	0.0602416	0.00109169	0.000669902	0.000793958	0	0.00191046	0	0.000719524	0.000570657	0	0	0	0.0015631	0.000521035	0.000769147	0	0	0.00109169	0	0	0	0
Total	1.2546	1.28667	1.25273	1.26746	1.23343	1.24984	1.24169	1.26658	1.25772	1.25157	1.25923	1.23262	1.28966	1.21298	1.2837	1.22533	1.22609	1.24084	1.26977	1.27642	1.24067	1.27487	1.26226	1.22328	1.27842	1.27954	1.2448	1.22766	1.25825	1.2595	1.29887	1.25349	1.25047	1.26157	1.25713	1.23898	1.25009	1.26846	1.22965	1.24387	1.27397	1.27493	1.27842	1.28621	1.29306	1.2735	1.25961	1.2608	1.25328
Norm. factor	3.18826	3.1088	3.19304	3.15592	3.24299	3.2004	3.22142	3.15811	3.18035	3.19599	3.17656	3.24513	3.10159	3.29766	3.11599	3.26442	3.2624	3.22363	3.15017	3.13377	3.22405	3.13759	3.16891	3.26989	3.12887	3.12613	3.21336	3.25824	3.17902	3.17587	3.07959	3.19109	3.19881	3.17066	3.18184	3.22846	3.19977	3.15343	3.25297	3.21577	3.1398	3.13743	3.12885	3.1099	3.09344	3.14096	3.1756	3.17259	3.19162
Ti	0	0.0644108	0.00319788	0.013196	0	0.00192315	0	0.00940964	0.00250833	0	0.00568671	0	0.0414691	0.00132106	0.00616342	0.0226813	0.00387998	0	0.0437749	0	0	0.000628469	0.00626809	0.00712279	0.00556216	0.00183939	0.00193094	0	0.00378081	0	0.0612226	0.00315598	0.0120538	0.00563647	0.00820568	0.00254627	0.00316457	0.00311874	0.000651581	0.00700492	0.0055816	0.00746271	0.0167648	0.028382	0.0159554	0.00247726	0.00755349	0.00504413	0.00127859
Al	0.00687925	0.00926895	0.04378	0.0138666	0.00184475	0.0116765	0.0178825	0.0221771	0.0185279	0.017616	0.00972021	0.0182051	0.226989	0.127623	0.00586762	0.0254209	0.0128626	0.0101172	0.00698244	0.00454876	0.00777861	0.00929324	0.010567	0.0046822	0.00834681	0.0176601	0.0157578	0.462909	0.010289	0.00778695	0.0102088	0.0206561	0.00934909	0.0108839	0.0252148	0.0048762	0.00175741	0.0103917	0.00102093	0.00662322	0.00751375	0.00510796	0.0168163	0.0167755	0.0145629	0.00850229	0.00610444	0.0149355	0.0105176
Fe++	3.98595	3.85328	3.92197	3.94938	3.98964	3.97088	3.97059	3.94184	3.96517	3.96785	3.96778	3.9696	3.41058	3.78352	3.96802	3.90896	3.97129	3.98337	3.88273	3.98757	3.98833	3.97971	3.9696	3.97085	3.97353	3.96183	3.9658	3.10398	3.97152	3.98619	3.8548	3.96243	3.95319	3.97039	3.93949	3.98548	3.98729	3.97817	3.98987	3.96672	3.97566	3.97358	3.93789	3.91443	3.93702	3.97835	3.96808	3.96353	3.97825
Mn	0.00112362	0.00306771	0.00517638	0.00342563	0.00525736	0.00775992	0.00258849	0.00427389	0.00201749	0.00572181	0.00626915	0.000274478	0.00900692	0.00325408	0.00891695	0.00381952	0.000275939	0.00145418	0.0180739	0.00561041	0	0.00283074	0.00201023	0.00350324	0.00282287	0.00365771	0	0.00537393	0.00201665	0	0.00499246	0.000269907	0.00257032	0.00201135	0.00399202	0.000273068	0.00374388	0	0.00729124	0.00430659	0.000265569	0.0014153	0.00335215	0.00363873	0.00584347	0.00394072	0.00765501	0.00398041	0.0034194
Mg	0.00261045	0.000925595	0.00079223	0	0.00233341	0	0	0.0018022	0	0	0	0.00281804	0.156987	0.0191456	0.00193278	0.00372573	0.00137605	0	0.00117239	0	0	0.00225757	0	0.00438101	0	0.00434352	0.00669709	0.196281	0.00347051	0.00212752	0.00244507	0	0.0061112	0	0.00228941	0.00184235	0	0	0	0.00502659	0.00163595	0.00241315	0	0	0.00337708	0	0	0	0
Total	3.99656	3.93095	3.97491	3.97987	3.99908	3.99224	3.99106	3.9795	3.98823	3.99119	3.98945	3.9909	3.84504	3.93487	3.9909	3.96461	3.98969	3.99494	3.95273	3.99773	3.99611	3.99472	3.98845	3.99054	3.99026	3.98933	3.99019	3.76855	3.99107	3.99611	3.93367	3.98652	3.98327	3.98892	3.97919	3.99502	3.99596	3.99169	3.99884	3.98968	3.99066	3.98998	3.97483	3.96323	3.97676	3.99327	3.98939	3.98749	3.99346
TiO2	0	1.655	0.08	0.334	0	0.048	0	0.238	0.063	0	0.143	0	1.068	0.032	0.158	0.555	0.095	0	1.11	0	0	0.016	0.158	0.174	0.142	0.047	0.048	0	0.095	0	1.588	0.079	0.301	0.142	0.206	0.063	0.079	0.079	0.016	0.174	0.142	0.19	0.428	0.729	0.412	0.063	0.19	0.127	0.032
Al2O3	0.11	0.152	0.699	0.224	0.029	0.186	0.283	0.358	0.297	0.281	0.156	0.286	3.731	1.973	0.096	0.397	0.201	0.16	0.113	0.074	0.123	0.151	0.17	0.073	0.136	0.288	0.25	7.243	0.165	0.125	0.169	0.33	0.149	0.175	0.404	0.077	0.028	0.168	0.016	0.105	0.122	0.083	0.274	0.275	0.24	0.138	0.098	0.24	0.168
Fe2O3	66.551	63.759	65.008	66.107	65.5932	66.0111	65.5025	66.0363	66.1586	66.0324	66.3199	65.0132	58.009	60.36	67.708	62.9144	64.5901	65.7139	64.3936	67.7874	65.7825	67.5013	66.4124	64.4975	67.3859	67.3814	65.6091	50.2218	66.3771	66.7803	64.5516	65.8219	65.4471	66.4075	65.5227	65.6204	66.2714	66.9569	65.3763	65.5263	67.1782	67.1828	66.3357	65.9459	67.2284	67.3304	66.336	66.2709	66.2742
FeO	29.9362	31.6786	29.7508	30.4238	29.3642	29.7431	29.6128	30.2534	30.0434	29.7789	30.0642	29.384	26.8047	28.1172	30.5651	29.4187	29.3368	29.6466	30.6096	30.4227	29.6838	30.3891	30.239	29.2101	30.605	30.4201	29.6318	23.2531	30.0278	30.086	31.8455	29.9834	29.8976	30.2115	29.9936	29.6447	29.8949	30.386	29.2933	29.6603	30.5229	30.5397	30.732	31.0917	30.9437	30.414	30.0838	30.1243	29.9173
MnO	0.025	0.07	0.115	0.077	0.115	0.172	0.057	0.096	0.045	0.127	0.14	0.006	0.206	0.07	0.203	0.083	0.006	0.032	0.407	0.127	0	0.064	0.045	0.076	0.064	0.083	0	0.117	0.045	0	0.115	0.006	0.057	0.045	0.089	0.006	0.083	0	0.159	0.095	0.006	0.032	0.076	0.083	0.134	0.089	0.171	0.089	0.076
MgO	0.033	0.012	0.01	0	0.029	0	0	0.023	0	0	0	0.035	2.04	0.234	0.025	0.046	0.017	0	0.015	0	0	0.029	0	0.054	0	0.056	0.084	2.428	0.044	0.027	0.032	0	0.077	0	0.029	0.023	0	0	0	0.063	0.021	0.031	0	0	0.044	0	0	0	0
Total	96.6553	97.3267	95.6627	97.1658	95.1304	96.1602	95.4553	97.0047	96.607	96.2193	96.8231	94.7243	91.8588	90.7862	98.7552	93.4141	94.2459	95.5524	96.6482	98.4111	95.5893	98.1505	97.0244	94.0846	98.3329	98.2754	95.6229	83.2629	96.7539	97.0182	98.301	96.2203	95.9287	96.9809	96.2443	95.4341	96.3563	97.5899	94.8606	95.6237	97.9921	98.0586	97.8457	98.1247	99.0021	98.0343	96.8787	96.8512	96.4676
Ti	0	0.0491566	0.00241355	0.00994703	0	0.00144517	0	0.00709358	0.0018868	0	0.00427631	0	0.0323553	0.0010072	0.0046331	0.0171628	0.00291751	0	0.0332238	0	0	0.000471974	0.00471468	0.00535476	0.0041818	0.00138323	0.00145177	0	0.00284195	0	0.0466912	0.00237499	0.0090783	0.00423909	0.00618645	0.00191209	0.00237583	0.00234393	0.000488828	0.00526727	0.004196	0.00561109	0.0126532	0.021484	0.0120365	0.00186107	0.00568017	0.00379497	0.00096051
Al	0.00516388	0.00707381	0.0330422	0.0104525	0.00138388	0.00877439	0.0134419	0.0167185	0.013937	0.0132411	0.00730943	0.013685	0.177103	0.0973013	0.00441074	0.0192359	0.00967187	0.0075975	0.00529945	0.00341351	0.00583963	0.00697913	0.00794823	0.00351998	0.00627538	0.0132805	0.0118474	0.368505	0.00773398	0.0058459	0.0077857	0.0155444	0.00704126	0.00818556	0.01901	0.00366171	0.00131939	0.00781002	0.000765917	0.00498026	0.0056485	0.00384059	0.0126921	0.0126983	0.010986	0.00638746	0.0045905	0.0112368	0.0079011
Fe3+	1.99484	1.89461	1.96213	1.96965	1.99862	1.98834	1.98656	1.96909	1.98229	1.98676	1.98414	1.98632	1.75819	1.90068	1.98632	1.94644	1.98449	1.9924	1.92825	1.99659	1.99416	1.99208	1.98262	1.98577	1.98536	1.98395	1.98525	1.6315	1.98658	1.99415	1.89883	1.97971	1.9748	1.98334	1.96862	1.99251	1.99393	1.9875	1.99826	1.98449	1.98596	1.98494	1.962	1.94433	1.96494	1.98989	1.98405	1.98117	1.99018
Fe2+	0.997197	1.04611	0.997909	1.00736	0.994306	0.995614	0.998054	1.00251	1.00037	0.995699	0.999562	0.997675	0.902843	0.983929	0.996477	1.01145	1.00168	0.998908	1.01862	0.99579	1	0.996651	1.0032	0.999428	1.00206	0.995366	0.996417	0.83947	0.998717	0.998403	1.04102	1.00217	1.00254	1.00273	1.00145	1.00032	0.999565	1.00234	0.995019	0.998249	1.00277	1.00273	1.01012	1.01873	1.00508	0.998901	0.999924	1.0008	0.998392
Mn	0.000843437	0.00234119	0.00390679	0.00258222	0.00394393	0.00583125	0.00194571	0.00322193	0.00151759	0.00430083	0.00471429	0.000206328	0.00702744	0.00248096	0.00670295	0.00289021	0.000207489	0.00109202	0.0137175	0.0042102	0	0.00212586	0.00151204	0.00263366	0.00212232	0.00275062	0	0.00427799	0.00151587	0	0.00380748	0.000203115	0.00193584	0.0015127	0.00300968	0.000205057	0.00281075	0	0.00547002	0.00323829	0.000199643	0.00106414	0.00253003	0.00275436	0.00440821	0.00296052	0.00575652	0.00299468	0.00256875
Mg	0.00195952	0.000706389	0.000597923	0	0.00175046	0	0	0.00135861	0	0	0	0.00211835	0.122485	0.0145969	0.00145289	0.00281924	0.0010347	0	0.000889808	0	0	0.00169541	0	0.00329355	0	0.00326635	0.00503517	0.156252	0.0026087	0.0015972	0.00186472	0	0.00460265	0	0.00172604	0.00138348	0	0	0	0.00377969	0.00122983	0.0018144	0	0	0.00254761	0	0	0	0
Total	3	3	3	3	3	3	3	3	3	3	3	3	3	3	3	3	3	3	3	3	3	3	3	3	3	3	3	3	3	3	3	3	3	3	3	3	3	3	3	3	3	3	3	3	3	3	3	3	3
Mg/(Mg+Fe2)	0.00196118	0.000674798	0.000598817	0	0.00175739	0	0	0.00135337	0	0	0	0.00211879	0.119459	0.0146184	0.00145591	0.00277957	0.00103191	0	0.000872784	0	0	0.00169822	0	0.00328461	0	0.00327083	0.00502787	0.156924	0.00260525	0.0015972	0.00178804	0	0.00457001	0	0.00172058	0.00138113	0	0	0	0.00377204	0.00122494	0.00180619	0	0	0.00252833	0	0	0	0
Fe2/(Fe2+Fe3)	0.333284	0.355732	0.337127	0.33838	0.332219	0.333656	0.3344	0.337364	0.335395	0.333852	0.335008	0.334343	0.339283	0.341096	0.334074	0.341951	0.335438	0.333937	0.345661	0.332776	0.333983	0.33347	0.335988	0.334794	0.335426	0.334092	0.334181	0.339734	0.334545	0.333629	0.354106	0.336088	0.336723	0.335802	0.337181	0.334239	0.333913	0.335249	0.332418	0.334676	0.335516	0.335624	0.339866	0.34381	0.338409	0.334216	0.335098	0.335617	0.33407
Fe2	0.997197	0.997095	0.995506	0.997443	0.994306	0.994177	0.998054	0.995452	0.998485	0.995699	0.995306	0.997675	0.874547	0.982939	0.991882	0.994387	0.998761	0.998908	0.985862	0.99579	1	0.996181	0.998495	0.994104	0.997887	0.993991	0.994972	0.83947	0.995887	0.998403	0.994581	0.999797	0.99352	0.998494	0.995293	0.998414	0.997196	1	0.994533	0.993019	0.998576	0.997138	0.997502	0.997304	0.993127	0.997045	0.994276	0.997017	0.997434
Mg	0.00195952	0.000673293	0.000596483	0	0.00175046	0	0	0.00134904	0	0	0	0.00211835	0.118646	0.0145822	0.00144619	0.00277167	0.00103169	0	0.000861196	0	0	0.00169461	0	0.00327601	0	0.00326184	0.00502787	0.156252	0.00260131	0.0015972	0.00178154	0	0.00456124	0	0.00171543	0.00138084	0	0	0	0.00375989	0.00122469	0.00180428	0	0	0.00251731	0	0	0	0
Al	0.00258194	0.00371976	0.0165611	0.00527877	0.000691942	0.00439354	0.00672095	0.00841898	0.00698165	0.00662057	0.00367041	0.00684248	0.0915123	0.0486997	0.00221564	0.0097859	0.00485009	0.00379875	0.00274078	0.00170676	0.00291982	0.00349121	0.00399294	0.00176946	0.00315087	0.00664946	0.0059323	0.184252	0.00387801	0.00292295	0.00408351	0.00779073	0.00355289	0.0041102	0.00956416	0.00183436	0.000661265	0.00391419	0.000383146	0.00250332	0.00283615	0.00193113	0.00642738	0.00648856	0.00555991	0.00319968	0.00230836	0.00563979	0.00395435
Fe3	0.997418	0.99628	0.983439	0.994721	0.999308	0.995606	0.993279	0.991581	0.993018	0.993379	0.99633	0.993158	0.908488	0.9513	0.997784	0.990214	0.99515	0.996201	0.997259	0.998293	0.99708	0.996509	0.996007	0.998231	0.996849	0.993351	0.994068	0.815748	0.996122	0.997077	0.995916	0.992209	0.996447	0.99589	0.990436	0.998166	0.999339	0.996086	0.999617	0.997497	0.997164	0.998069	0.993573	0.993511	0.99444	0.9968	0.997692	0.99436	0.996046
Spinel	0.00195952	0.000706389	0.000597923	0	0.00175046	0	0	0.00135861	0	0	0	0.00211835	0.122485	0.0145969	0.00145289	0.00281924	0.0010347	0	0.000889808	0	0	0.00169541	0	0.00329355	0	0.00326635	0.00503517	0.156252	0.0026087	0.0015972	0.00186472	0	0.00460265	0	0.00172604	0.00138348	0	0	0	0.00377969	0.00122983	0.0018144	0	0	0.00254761	0	0	0	0
Hercynite	-0.00022102	0.000489322	0.0120164	0.00264404	-0.00500245	-0.00144406	0.00477524	0.00377872	0.00545089	0.00231974	-0.00105958	0.0045178	-0.0409611	0.0315728	-0.00595047	0.00390849	0.00359374	0.00270673	-0.0119576	-0.00250345	0.00291982	-0.000331703	0.00246207	-0.00416722	0.00101537	0.000623286	0.000888515	0.0237222	-0.00025758	0.00132575	-0.00177936	0.00756911	-0.00301785	0.00258008	0.00476927	0.000242315	-0.00215105	0.00390501	-0.00508706	-0.00452785	0.00139478	-0.000958251	0.00381602	0.0035948	-0.00146283	0.000233206	-0.00346127	0.00262371	0.0013818
Galaxite	0.000843437	0.00234119	0.00390679	0.00258222	0.00394393	0.00583125	0.00194571	0.00322193	0.00151759	0.00430083	0.00471429	0.000206328	0.00702744	0.00248096	0.00670295	0.00289021	0.000207489	0.00109202	0.0137175	0.0042102	0	0.00212586	0.00151204	0.00263366	0.00212232	0.00275062	0	0.00427799	0.00151587	0	0.00380748	0.000203115	0.00193584	0.0015127	0.00300968	0.000205057	0.00281075	0	0.00547002	0.00323829	0.000199643	0.00106414	0.00253003	0.00275436	0.00440821	0.00296052	0.00575652	0.00299468	0.00256875
Gahnite	0	0	0	0	0	0	0	0	0	0	0	0	0	0	0	0	0	0	0	0	0	0	0	0	0	0	0	0	0	0	0	0	0	0	0	0	0	0	0	0	0	0	0	0	0	0	0	0	0
Trevorite	0	0	0	0	0	0	0	0	0	0	0	0	0	0	0	0	0	0	0	0	0	0	0	0	0	0	0	0	0	0	0	0	0	0	0	0	0	0	0	0	0	0	0	0	0	0	0	0	0
Magnetite	0.997418	0.947307	0.981065	0.984827	0.999308	0.994168	0.993279	0.984547	0.991145	0.993379	0.992069	0.993158	0.879093	0.950342	0.993162	0.973219	0.992247	0.996201	0.964126	0.998293	0.99708	0.996038	0.991311	0.992885	0.992681	0.991977	0.992625	0.815748	0.993291	0.997077	0.949416	0.989853	0.987401	0.991668	0.984309	0.996257	0.996964	0.993751	0.999128	0.992243	0.99298	0.992469	0.981001	0.972167	0.982471	0.994945	0.992025	0.990587	0.995089
Chromite	0	0	0	0	0	0	0	0	0	0	0	0	0	0	0	0	0	0	0	0	0	0	0	0	0	0	0	0	0	0	0	0	0	0	0	0	0	0	0	0	0	0	0	0	0	0	0	0	0
Ulvöspinel	0	0.0491566	0.00241355	0.00994703	0	0.00144517	0	0.00709358	0.0018868	0	0.00427631	0	0.0323553	0.0010072	0.0046331	0.0171628	0.00291751	0	0.0332238	0	0	0.000471974	0.00471468	0.00535476	0.0041818	0.00138323	0.00145177	0	0.00284195	0	0.0466912	0.00237499	0.0090783	0.00423909	0.00618645	0.00191209	0.00237583	0.00234393	0.000488828	0.00526727	0.004196	0.00561109	0.0126532	0.021484	0.0120365	0.00186107	0.00568017	0.00379497	0.00096051
[truncated: 44 more columns]
