# Supplementary material for: From magmatic flow to hydrothermal collapse: AMS constraints on structural and alteration dynamics in the Shadan Au-rich porphyry deposit, South Khorasan, Eastern Iran
Source: Research Square preprint supplement (doi:10.21203/rs.3.rs-8728700/v1), 2026-02-20
Supplement: Supplementary file 3 [file a20f0999d0da6b3614afa6fb.xlsx]

## Sheet: Sheet1
		Sample No	49	60	62	63	120	80	82	83	81	117	121	101	131	116	128	190	238	217	216	212	213	167	279	251	274	261	275	284	285	260	318	319	386	387	385	388	378	381	372	377	391	399	400	398	401	402
		SiO2	34.259	35.385	35.363	33.461	38.36	36.796	36.676	36.569	35.15	32.697	32.588	31.573	29.792	29.237	29.186	26.42	25.477	27.511	29.041	28.027	28.3	27.481	8.777	5.118	14.301	16.528	17.008	17.341	28.853	29.05	23.184	22.427	4.199	14.642	9.505	21.797	40.133	39.425	39.165	41.837	39.592	40.31	39.889	36.181	44.65	49.426
		TiO2	3.124	2.468	2.605	2.504	2.192	4.388	6.369	4.473	4.236	14.021	3.272	3.338	3.405	3.267	0.569	0.322	0.072	0.092	0.166	0.295	0.147	0	0.511	0.809	0.723	0.39	0.358	0.463	0.466	0.358	1.279	1.425	7.205	2.847	2.187	2.04	2.995	1.639	5.885	1.529	0.733	1.273	0	0.019	0.367	0.464
		Al2O3	16.161	14.542	14.402	15.075	9.747	13.059	12.637	12.666	13.178	10.512	15.576	14.714	15.195	16.847	16.517	25.233	20.688	19.044	19.204	19.192	19.247	18.584	8.141	2.115	10.589	6.279	15.655	17.243	26.228	16.751	16.134	14.015	6.56	11.774	9.392	19.641	11.826	18.084	16.982	27.589	14.976	12.213	11.68	14.286	10.98	9.986
		FeO	14.788	15.47	14.557	15.108	12.186	13.642	13.98	16.102	15.297	7.907	16.73	15.967	16.171	15.73	19.977	32.38	23.498	18.095	17.509	16.92	16.854	15.98	67.359	64.903	58.239	54.236	53.97	51.559	32.785	32.652	29.431	14.53	58.464	55.517	52.087	38.313	12.772	4.743	2.735	2.68	0.237	0.17	0.128	0.103	0.049	0.024
		MnO	0.405	0.363	0.217	0.223	0.161	0.259	0.322	0.37	0.328	0.19	0.438	0.397	0.341	0.209	0.347	0	0.103	0.451	0.507	0.625	0.514	0.842	0	0.013	0	0	0	0.027	0	0.007	0.57	0.488	0	0	0	0	0	0.12	0	0.092	0.036	0	0	0.092	0.043	0
		MgO	12.226	11.79	12.602	11.811	16.18	14.623	13.022	15.445	15.048	8.769	16.86	16.065	16.057	16.358	17.357	0.428	0.371	19.619	20.769	19.894	19.896	19.194	0.02	0.111	0.057	0.085	0.109	0.042	0.12	0.075	14.936	15.386	0.167	1.958	0.755	0.296	14.412	11.312	1.977	5.858	8.587	10.374	10.979	10.411	9.291	7.075
		CaO	0.022	0.03	0.172	0.065	3.822	0.022	1.394	0.024	0.035	15.559	0.212	0.194	0.252	0.214	0.048	0.272	0.921	0.011	0.016	0	0.026	0	0.076	0.176	0.017	0.022	0	0.045	0.119	0	0.299	1.229	0.889	0.122	2.345	0.242	0.79	0.193	0.464	0.136	0.152	0.05	0.055	0.097	0.05	0.014
		BaO	0	0	0	0	0	0	0	0	0	0	0	0	0	0	0	0	0	0	0	0	0	0	0	0	0	0	0	0	0	0	0	0	0	0	0	0	0	0	0	0	0	0	0	0	0	0
		Na2O	0.103	0.054	0.085	0.097	0.153	0.121	0.101	0.047	0.082	0.019	0.004	0.034	0.021	0.027	0.016	0	0	0.021	0.04	0	0.042	0.011	0	0.006	0.019	0.042	0.064	0.024	0.011	0.064	0.574	1.417	0.115	0	0	0	0.068	0.119	0	0.06	0.11	0.046	0.053	0.032	0.032	0.08
		K2O	7.905	8.342	8.909	8.001	1.135	8.69	8.282	7.733	7.052	0.372	2.57	4	2.522	1.269	0.551	0.278	0.273	0	0.038	0.019	0.043	0	0.044	0.023	0.022	2.469	0.048	0.061	0.12	3.137	0.091	0.815	0.009	0.882	0.033	0.141	6.65	5.76	2.379	3.389	6.545	7.877	7.728	8.839	7.682	6.492
		Total(%)	88.993	88.444	88.912	86.345	83.936	91.6	92.783	93.429	90.406	90.046	88.25	86.282	83.756	83.158	84.568	85.333	71.403	84.844	87.29	84.972	85.069	82.092	84.928	73.274	83.967	80.051	87.212	86.805	88.702	82.094	86.498	71.732	77.608	87.742	76.304	82.47	89.646	81.395	69.587	83.17	70.968	72.313	70.512	70.06	73.144	73.561
		H2O(c)	11.8125	11.6864	11.7533	11.3968	11.7075	12.198	12.2951	12.3416	12.0008	12.1507	11.9077	11.5315	11.2409	11.304	11.2842	10.8042	9.3452	11.4469	11.8559	11.5458	11.5764	11.181	9.0091	7.5166	9.1286	8.36	9.7176	9.7404	11.3582	10.0863	10.8567	9.4649	7.9744	9.5955	8.024	9.7845	12.2501	11.8403	10.6614	12.6928	10.6429	10.696	10.4462	10.2032	10.9804	11.3084
		Fe2O3(c)	0	0	0	0	0	0	0	0	0	0	0	0	0	0	0	0	0	0	0	0	0	0	42.4686	47.5416	24.7451	15.2066	15.4545	12.0275	0	0	4.3078	0	32.0094	20.1678	20.0502	0	0	0	0	0	0	0	0	0	0	0
		FeO(c)(%)	0	0	0	0	0	0	0	0	0	0	0	0	0	0	0	0	0	0	0	0	0	0	29.1454	22.1247	35.9731	40.5529	40.0639	40.7365	0	0	25.5548	0	29.6617	37.3699	34.0456	0	0	0	0	0	0	0	0	0.103	0.049	0
		(apfu)[Si	3.4784	3.6315	3.6085	3.5212	3.9297	3.6179	3.5776	3.5537	3.5128	3.2273	3.2822	3.2837	3.1786	3.102	3.102	2.9328	3.2696	2.8824	2.9378	2.9114	2.9319	2.9478	1.1684	0.8166	1.8789	2.3711	2.0991	2.1352	3.0467	3.4542	2.5611	2.8418	0.6315	1.8301	1.4207	2.6718	3.9292	3.9935	4.4058	3.9532	4.4616	4.5199	4.5797	4.2529	4.8769	5.242
		Ti	0.2385	0.1905	0.1999	0.1982	0.1689	0.3244	0.4672	0.3269	0.3184	1.0407	0.2478	0.2611	0.2732	0.2607	0.0455	0.0269	0.0069	0.0072	0.0126	0.023	0.0115	0	0.0512	0.0971	0.0714	0.0421	0.0332	0.0429	0.037	0.032	0.1063	0.1358	0.8149	0.2676	0.2458	0.188	0.2205	0.1248	0.4978	0.1086	0.0621	0.1073	0	0.0017	0.0301	0.037
		Al	1.9339	1.7589	1.732	1.8697	1.1768	1.5133	1.4528	1.4507	1.5522	1.2229	1.8489	1.8036	1.9107	2.1066	2.069	3.3012	3.1291	2.3516	2.2896	2.3496	2.3501	2.3494	1.2773	0.3977	1.6396	1.0616	2.2771	2.5023	3.264	2.3475	2.1006	2.093	1.1628	1.7344	1.6545	2.8374	1.3646	2.1589	2.2515	3.0724	1.989	1.614	1.5804	1.9791	1.4134	1.2482
		Fe(2+)	1.2556	1.3277	1.2422	1.3296	1.044	1.1217	1.1404	1.3086	1.2785	0.6527	1.4092	1.3888	1.4429	1.3957	1.7757	3.006	2.522	1.5855	1.4812	1.4699	1.4602	1.4335	3.2448	2.9522	3.9525	4.8653	4.1352	4.1947	2.8951	3.2469	2.3609	1.5397	3.7307	3.9062	4.2556	3.9274	1.0457	0.4018	0.2573	0.2118	0.0223	0.0159	0.0123	0.0101	0.0045	0.0021
		Mn	0.0348	0.0316	0.0188	0.0199	0.014	0.0216	0.0266	0.0305	0.0278	0.0159	0.0374	0.035	0.0308	0.0188	0.0312	0	0.0112	0.04	0.0434	0.055	0.0451	0.0765	0	0.0018	0	0	0	0.0028	0	0.0007	0.0533	0.0524	0	0	0	0	0	0.0103	0	0.0074	0.0034	0	0	0.0092	0.004	0
		Mg	1.8505	1.8038	1.917	1.8529	2.4709	2.1434	1.8936	2.2375	2.2419	1.2903	2.5315	2.4908	2.554	2.5873	2.7501	0.0708	0.071	3.0643	3.1321	3.0807	3.0728	3.0693	0.004	0.0264	0.0112	0.0182	0.0201	0.0077	0.0189	0.0133	2.4597	2.9064	0.0374	0.3648	0.1682	0.0541	2.1035	1.7082	0.3315	0.8252	1.4425	1.7341	1.8791	1.8243	1.5128	1.1186
		Ca	0.0024	0.0033	0.0188	0.0073	0.4195	0.0023	0.1457	0.0025	0.0037	1.6454	0.0229	0.0216	0.0288	0.0243	0.0055	0.0324	0.1266	0.0012	0.0017	0	0.0029	0	0.0108	0.0301	0.0024	0.0034	0	0.0059	0.0135	0	0.0354	0.1669	0.1433	0.0163	0.3755	0.0318	0.0829	0.0209	0.0559	0.0138	0.0184	0.006	0.0068	0.0122	0.0059	0.0016
		Na	0.0203	0.0107	0.0168	0.0198	0.0304	0.0231	0.0191	0.0089	0.0159	0.0036	0.0008	0.0069	0.0043	0.0056	0.0033	0	0	0.0043	0.0078	0	0.0084	0.0023	0	0.0019	0.0048	0.0117	0.0153	0.0057	0.0023	0.0148	0.1229	0.3481	0.0335	0	0	0	0.0129	0.0234	0	0.011	0.024	0.01	0.0118	0.0073	0.0068	0.0165
		K	1.0239	1.0922	1.1598	1.0741	0.1483	1.09	1.0306	0.9587	0.8991	0.0468	0.3302	0.5307	0.3433	0.1718	0.0747	0.0394	0.0447	0	0.0049	0.0025	0.0057	0	0.0075	0.0047	0.0037	0.4519	0.0076	0.0096	0.0162	0.4759	0.0128	0.1317	0.0017	0.1406	0.0063	0.022	0.8306	0.7443	0.3414	0.4085	0.9409	1.1268	1.1319	1.3255	1.0704	0.8784
		OH](apfu)	8	8	8	8	8	8	8	8	8	8	8	8	8	8	8	8	8	8	8	8	8	8	8	8	8	8	8	8	8	8	8	8	8	8	8	8	8	8	8	8	8	8	8	8	8	8
		[Si	3.4784	3.6315	3.6085	3.5212	3.9297	3.6179	3.5776	3.5537	3.5128	3.2273	3.2822	3.2837	3.1786	3.102	3.102	2.9328	3.2696	2.8824	2.9378	2.9114	2.9319	2.9478	1.1684	0.8166	1.8789	2.3711	2.0991	2.1352	3.0467	3.4542	2.5611	2.8418	0.6315	1.8301	1.4207	2.6718	3.9292	3.9935	4.4058	3.9532	4.4616	4.5199	4.5797	4.2529	4.8769	5.242
		Al(IV)	0.5216	0.3685	0.3915	0.4788	0.0703	0.3821	0.4224	0.4463	0.4872	0.7727	0.7178	0.7163	0.8214	0.898	0.898	1.0672	0.7304	1.1176	1.0622	1.0886	1.0681	1.0522	1.2773	0.3977	1.6396	1.0616	1.9009	1.8648	0.9533	0.5458	1.4389	1.1582	1.1628	1.7344	1.6545	1.3282	0.0708	0.0065	0	0.0468	0	0	0	0	0	0
		Total]Tetrahedral	4	4	4	4	4	4	4	4	4	4	4	4	4	4	4	4	4	4	4	4	4	4	2.4457	1.2143	3.5185	3.4328	4	4	4	4	4	4	1.7943	3.5645	3.0752	4	4	4	4.4058	4	4.4616	4.5199	4.5797	4.2529	4.8769	5.242
		[Al(VI)	1.4122	1.3903	1.3406	1.3909	1.1065	1.1311	1.0304	1.0044	1.065	0.4502	1.1312	1.0873	1.0893	1.2086	1.171	2.234	2.3988	1.234	1.2273	1.261	1.282	1.2972	0	0	0	0	0.3763	0.6375	2.3107	1.8017	0.6617	0.9348	0	0	0	1.5092	1.2937	2.1524	2.2515	3.0255	1.989	1.614	1.5804	1.9791	1.4134	1.2482
		Ti	0.2385	0.1905	0.1999	0.1982	0.1689	0.3244	0.4672	0.3269	0.3184	1.0407	0.2478	0.2611	0.2732	0.2607	0.0455	0.0269	0.0069	0.0072	0.0126	0.023	0.0115	0	0.0512	0.0971	0.0714	0.0421	0.0332	0.0429	0.037	0.032	0.1063	0.1358	0.8149	0.2676	0.2458	0.188	0.2205	0.1248	0.4978	0.1086	0.0621	0.1073	0	0.0017	0.0301	0.037
		Fe2+	1.2556	1.3277	1.2422	1.3296	1.044	1.1217	1.1404	1.3086	1.2785	0.6527	1.4092	1.3888	1.4429	1.3957	1.7757	3.006	2.522	1.5855	1.4812	1.4699	1.4602	1.4335	3.2448	2.9522	3.9525	4.8653	4.1352	4.1947	2.8951	3.2469	2.3609	1.5397	3.7307	3.9062	4.2556	3.9274	1.0457	0.4018	0.2573	0.2118	0.0223	0.0159	0.0123	0.0101	0.0045	0.0021
		Mn	0.0348	0.0316	0.0188	0.0199	0.014	0.0216	0.0266	0.0305	0.0278	0.0159	0.0374	0.035	0.0308	0.0188	0.0312	0	0.0112	0.04	0.0434	0.055	0.0451	0.0765	0	0.0018	0	0	0	0.0028	0	0.0007	0.0533	0.0524	0	0	0	0	0	0.0103	0	0.0074	0.0034	0	0	0.0092	0.004	0
		Mg	1.8505	1.8038	1.917	1.8529	2.4709	2.1434	1.8936	2.2375	2.2419	1.2903	2.5315	2.4908	2.554	2.5873	2.7501	0.0708	0.071	3.0643	3.1321	3.0807	3.0728	3.0693	0.004	0.0264	0.0112	0.0182	0.0201	0.0077	0.0189	0.0133	2.4597	2.9064	0.0374	0.3648	0.1682	0.0541	2.1035	1.7082	0.3315	0.8252	1.4425	1.7341	1.8791	1.8243	1.5128	1.1186
		Total]Octahedral	4.7917	4.7439	4.7185	4.7915	4.8042	4.7422	4.5583	4.9078	4.9315	3.4498	5.3571	5.263	5.3902	5.4711	5.7735	5.3377	5.0099	5.9312	5.8967	5.8895	5.8716	5.8764	7.5543	8.7857	6.4815	6.5672	6	6	5.2617	5.0947	6	5.5691	8.2057	6.4355	6.9248	5.6787	4.6634	4.3974	3.3382	4.1785	3.5194	3.4714	3.4718	3.8244	2.9649	2.4059
		[Octahedral vacant]	1.2083	1.2561	1.2815	1.2085	1.1958	1.2578	1.4417	1.0922	1.0685	2.5502	0.6429	0.737	0.6098	0.5289	0.2265	0.6623	0.9901	0.0688	0.1033	0.1105	0.1284	0.1236	0	0	0	0	0	0	0.7383	0.9053	0	0.4309	0	0	0	0.3213	1.3366	1.6026	2.6618	1.8215	2.4806	2.5286	2.5282	2.1756	3.0351	3.5941
		[Ca	0.0024	0.0033	0.0188	0.0073	0.4195	0.0023	0.1457	0.0025	0.0037	1.6454	0.0229	0.0216	0.0288	0.0243	0.0055	0.0324	0.1266	0.0012	0.0017	0	0.0029	0	0.0108	0.0301	0.0024	0.0034	0	0.0059	0.0135	0	0.0354	0.1669	0.1433	0.0163	0.3755	0.0318	0.0829	0.0209	0.0559	0.0138	0.0184	0.006	0.0068	0.0122	0.0059	0.0016
		Na	0.0203	0.0107	0.0168	0.0198	0.0304	0.0231	0.0191	0.0089	0.0159	0.0036	0.0008	0.0069	0.0043	0.0056	0.0033	0	0	0.0043	0.0078	0	0.0084	0.0023	0	0.0019	0.0048	0.0117	0.0153	0.0057	0.0023	0.0148	0.1229	0.3481	0.0335	0	0	0	0.0129	0.0234	0	0.011	0.024	0.01	0.0118	0.0073	0.0068	0.0165
		K	1.0239	1.0922	1.1598	1.0741	0.1483	1.09	1.0306	0.9587	0.8991	0.0468	0.3302	0.5307	0.3433	0.1718	0.0747	0.0394	0.0447	0	0.0049	0.0025	0.0057	0	0.0075	0.0047	0.0037	0.4519	0.0076	0.0096	0.0162	0.4759	0.0128	0.1317	0.0017	0.1406	0.0063	0.022	0.8306	0.7443	0.3414	0.4085	0.9409	1.1268	1.1319	1.3255	1.0704	0.8784
		Total]	1.0466	1.1062	1.1954	1.1013	0.5982	1.1154	1.1954	0.97	0.9187	1.6959	0.3539	0.5592	0.3764	0.2016	0.0835	0.0717	0.1713	0.0055	0.0145	0.0025	0.017	0.0023	0.0183	0.0366	0.0109	0.4669	0.0229	0.0212	0.0319	0.4906	0.1712	0.6467	0.1785	0.157	0.3818	0.0538	0.9264	0.7886	0.3973	0.4333	0.9833	1.1428	1.1505	1.345	1.083	0.8964
		[Si	3.4784	3.6315	3.6085	3.5212	3.9297	3.6179	3.5776	3.5537	3.5128	3.2273	3.2822	3.2837	3.1786	3.102	3.102	2.9328	3.2696	2.8824	2.9378	2.9114	2.9319	2.9478	1.1684	0.8166	1.8789	2.3711	2.0991	2.1352	3.0467	3.4542	2.5611	2.8418	0.6315	1.8301	1.4207	2.6718	3.9292	3.9935	4.4058	3.9532	4.4616	4.5199	4.5797	4.2529	4.8769	5.242
		Fe/(Fe+Mg)	0.4042	0.424	0.3932	0.4178	0.297	0.3436	0.3759	0.369	0.3632	0.3359	0.3576	0.358	0.361	0.3504	0.3923	0.977	0.9726	0.341	0.3211	0.323	0.3221	0.3184	0.9995	0.997	0.9983	0.9972	0.9964	0.9986	0.9935	0.9959	0.525	0.3463	0.9949	0.9408	0.9748	0.9864	0.3321	0.1904	0.437	0.2042	0.0152	0.0091	0.0065	0.0055	0.0029	0.0019
		Fe(total)	1.2556	1.3277	1.2422	1.3296	1.044	1.1217	1.1404	1.3086	1.2785	0.6527	1.4092	1.3888	1.4429	1.3957	1.7757	3.006	2.522	1.5855	1.4812	1.4699	1.4602	1.4335	7.4991	8.6604	6.3989	6.507	5.5705	5.3091	2.8951	3.2469	2.719	1.5397	7.3534	5.803	6.5108	3.9274	1.0457	0.4018	0.2573	0.2118	0.0223	0.0159	0.0123	0.0101	0.0045	0.0021
		(Al+Mg+Fe)	5.04	4.8904	4.8913	5.0522	4.6917	4.7784	4.4869	4.9968	5.0726	3.1659	5.7896	5.6832	5.9076	6.0896	6.5948	6.378	5.7221	7.0015	6.9029	6.9002	6.8832	6.8521	8.7804	9.0846	8.0497	7.5868	7.8677	7.8191	6.178	5.6077	7.2793	6.5392	8.5536	7.9023	8.3335	6.8189	4.5137	4.2688	2.8403	4.1093	3.4539	3.364	3.4718	3.8136	2.9308	2.3689
		(XMg+XFe)	3.1062	3.1315	3.1593	3.1825	3.5149	3.2651	3.0341	3.5461	3.5204	1.943	3.9407	3.8796	3.9968	3.983	4.5258	3.0768	2.5929	4.6498	4.6133	4.5506	4.5331	4.5027	7.5031	8.6868	6.4101	6.5251	5.5905	5.3169	2.914	3.2602	5.1787	4.4461	7.3908	6.1679	6.679	3.9815	3.1492	2.1099	0.5888	1.0369	1.4649	1.75	1.8914	1.8345	1.5173	1.1207
		Octahedral occupancy	4.7917	4.7439	4.7185	4.7915	4.8042	4.7422	4.5583	4.9078	4.9315	3.4498	5.3571	5.263	5.3902	5.4711	5.7735	5.3377	5.0099	5.9312	5.8967	5.8895	5.8716	5.8764	7.5543	8.7857	6.4815	6.5672	6	6	5.2617	5.0947	6	5.5691	8.2057	6.4355	6.9248	5.6787	4.6634	4.3974	3.3382	4.1785	3.5194	3.4714	3.4718	3.8244	2.9649	2.4059
		Vacancy	1.2083	1.2561	1.2815	1.2085	1.1958	1.2578	1.4417	1.0922	1.0685	2.5502	0.6429	0.737	0.6098	0.5289	0.2265	0.6623	0.9901	0.0688	0.1033	0.1105	0.1284	0.1236	0	0	0	0	0	0	0.7383	0.9053	0	0.4309	0	0	0	0.3213	1.3366	1.6026	2.6618	1.8215	2.4806	2.5286	2.5282	2.1756	3.0351	3.5941
		(XAl+XVacancy)	3.1421	3.015	3.0136	3.0782	2.3726	2.7711	2.8945	2.5428	2.6207	3.773	2.4919	2.5406	2.5205	2.6356	2.2955	3.9635	4.1193	2.4205	2.3929	2.4601	2.4784	2.473	1.2773	0.3977	1.6396	1.0616	2.2771	2.5023	4.0024	3.2528	2.1006	2.5239	1.1628	1.7344	1.6545	3.1587	2.7011	3.7614	4.9133	4.8939	4.4696	4.1426	4.1086	4.1547	4.4486	4.8423
		(Fe2+Mg)	3.1062	3.1315	3.1593	3.1825	3.5149	3.2651	3.0341	3.5461	3.5204	1.943	3.9407	3.8796	3.9968	3.983	4.5258	3.0768	2.5929	4.6498	4.6133	4.5506	4.5331	4.5027	3.2487	2.9786	3.9636	4.8835	4.1552	4.2024	2.914	3.2602	4.8206	4.4461	3.7682	4.271	4.4239	3.9815	3.1492	2.1099	0.5888	1.0369	1.4649	1.75	1.8914	1.8345	1.5173	1.1207
		R2+	3.141	3.1631	3.178	3.2024	3.5289	3.2867	3.0607	3.5766	3.5482	1.9589	3.9781	3.9146	4.0277	4.0018	4.557	3.0768	2.6041	4.6899	4.6567	4.6055	4.5782	4.5792	3.2487	2.9804	3.9636	4.8835	4.1552	4.2053	2.914	3.2609	4.8739	4.4985	3.7682	4.271	4.4239	3.9815	3.1492	2.1202	0.5888	1.0443	1.4683	1.75	1.8914	1.8436	1.5213	1.1207
		R3+]	1.6507	1.5808	1.5405	1.5891	1.2753	1.4556	1.4976	1.3312	1.3833	1.4909	1.379	1.3484	1.3625	1.4693	1.2165	2.2609	2.4057	1.2413	1.24	1.284	1.2935	1.2972	4.3055	5.8053	2.5179	1.6837	1.8448	1.7947	2.3477	1.8338	1.1261	1.0706	4.4375	2.1645	2.501	1.6972	1.5142	2.2772	2.7493	3.1342	2.0511	1.7213	1.5804	1.9808	1.4436	1.2852
		[Al/(Al+Mg+Fe2+)	0.3837	0.3597	0.3541	0.3701	0.2508	0.3167	0.3238	0.2903	0.306	0.3863	0.3194	0.3174	0.3234	0.3459	0.3137	0.5176	0.5469	0.3359	0.3317	0.3405	0.3414	0.3429	0.2822	0.1178	0.2926	0.1786	0.354	0.3732	0.5283	0.4186	0.3035	0.3201	0.2358	0.2888	0.2722	0.4161	0.3023	0.5057	0.7927	0.7477	0.5759	0.4798	0.4552	0.519	0.4823	0.5269
		Mg/(Mg+Fe2+)	0.5958	0.576	0.6068	0.5822	0.703	0.6564	0.6241	0.631	0.6368	0.6641	0.6424	0.642	0.639	0.6496	0.6077	0.023	0.0274	0.659	0.6789	0.677	0.6779	0.6816	0.0012	0.0089	0.0028	0.0037	0.0048	0.0018	0.0065	0.0041	0.5103	0.6537	0.0099	0.0854	0.038	0.0136	0.6679	0.8096	0.563	0.7958	0.9848	0.9909	0.9935	0.9945	0.9971	0.9981
		Na+K+2Ca	1.049	1.1095	1.2142	1.1086	1.0177	1.1177	1.3411	0.9725	0.9225	3.3413	0.3768	0.5808	0.4052	0.226	0.0889	0.1041	0.298	0.0067	0.0162	0.0025	0.0199	0.0023	0.0292	0.0667	0.0133	0.4703	0.0229	0.0272	0.0453	0.4906	0.2065	0.8136	0.3218	0.1733	0.7574	0.0856	1.0092	0.8096	0.4533	0.447	1.0016	1.1488	1.1572	1.3572	1.0889	0.898
		AlVI+Fe2+	2.6678	2.7181	2.5828	2.7205	2.1504	2.2528	2.1708	2.313	2.3435	1.1029	2.5404	2.4761	2.5322	2.6043	2.9467	5.24	4.9207	2.8195	2.7086	2.7308	2.7422	2.7306	3.2448	2.9522	3.9525	4.8653	4.5114	4.8322	5.2058	5.0487	3.0226	2.4745	3.7307	3.9062	4.2556	5.4366	2.3395	2.5541	2.5088	3.2373	2.0113	1.6299	1.5927	1.9892	1.4179	1.2503
		AlVI+Mg+Fe2+	4.5184	4.5219	4.4998	4.5734	4.6214	4.3962	4.0645	4.5505	4.5854	2.3932	5.0719	4.9669	5.0862	5.1916	5.6968	5.3108	4.9917	5.8839	5.8406	5.8115	5.8151	5.7999	3.2487	2.9786	3.9636	4.8835	4.5315	4.8399	5.2247	5.062	5.4823	5.381	3.7682	4.271	4.4239	5.4906	4.4429	4.2623	2.8403	4.0625	3.4539	3.364	3.4718	3.8136	2.9308	2.3689
		AlVI/(Si+AlIV)]	0.1304	0.0921	0.0979	0.1197	0.0176	0.0955	0.1056	0.1116	0.1218	0.1932	0.1794	0.1791	0.2053	0.2245	0.2245	0.2668	0.1826	0.2794	0.2656	0.2722	0.267	0.2631	0.5223	0.3275	0.466	0.3093	0.4752	0.4662	0.2383	0.1364	0.3597	0.2895	0.648	0.4866	0.538	0.3321	0.0177	0.0016	0	0.0117	0	0	0	0	0	0
		%[Al-chl	21.3999	19.4489	19.2456	20.4408	12.7321	17.2111	17.8721	15.9396	16.9251	25.5486	18.2275	18.156	18.7834	20.2887	18.1592	31.0802	31.3434	19.9835	19.6003	20.2151	20.2068	20.2537	19.6584	6.6763	20.6834	10.8697	25.1259	25.8504	31.2367	23.1875	19.1579	19.4483	15.4291	20.3046	18.6995	25.8385	15.3566	25.3254	39.6343	37.8141	28.7936	23.9888	22.7609	25.9483	24.114	26.3453
		Fe-chl	37.6446	40.6608	38.1522	39.0447	33.8003	34.0341	35.538	34.8894	34.1823	20.5359	31.8599	31.6959	31.0031	29.8752	33.5657	67.5861	67.2347	27.9362	26.7743	26.7746	26.9506	26.827	80.2195	92.4373	79.0349	88.758	74.4315	73.9904	68.4018	76.5498	35.9756	26.5387	83.5772	71.1533	77.4978	73.1764	37.2994	34.5987	48.693	41.874	29.4403	24.4627	23.1149	26.2138	24.2667	26.4352
		Mg-chl]	40.9554	39.8903	42.6022	40.5145	53.4676	48.7548	46.5899	49.171	48.8926	53.9156	49.9126	50.148	50.2135	49.8361	48.2751	1.3337	1.4219	52.0803	53.6254	53.0103	52.8425	52.9192	0.1222	0.8864	0.2817	0.3722	0.4426	0.1593	0.3615	0.2626	44.8665	54.0129	0.9937	8.5421	3.8028	0.9851	47.344	40.0759	11.6727	20.3119	41.7661	51.5485	54.1242	47.838	51.6193	47.2195
		%[Clinochlore	58.9151	57.0265	60.3212	57.8602	70.0203	65.2142	61.8697	62.5604	63.1853	65.8698	63.6369	63.6295	63.4104	64.6537	60.3494	2.302	2.7257	65.3396	67.2587	66.8911	67.1192	67.0255	0.1222	0.8859	0.2817	0.3722	0.4826	0.1833	0.6482	0.4077	50.467	64.6082	0.9937	8.5421	3.8028	1.3585	66.7938	80.5646	56.3042	79.0159	98.2449	99.0891	99.3502	98.954	99.4443	99.8101
		Chamosite	39.976	41.9759	39.0886	41.5191	29.5838	34.1296	37.2611	36.588	36.0322	33.3193	35.4238	35.4771	35.8245	34.877	38.9651	97.698	96.8444	33.8069	31.8084	31.9149	31.8956	31.3039	99.8778	99.0552	99.7183	99.6278	99.5174	99.7497	99.3518	99.5707	48.4388	34.2275	99.0063	91.4579	96.1972	98.6415	33.2062	18.9498	43.6958	20.279	1.5211	0.9109	0.6498	0.5492	0.2942	0.1899
		Pennantite]	1.1089	0.9976	0.5902	0.6207	0.3959	0.6563	0.8692	0.8515	0.7825	0.8109	0.9393	0.8934	0.7651	0.4693	0.6855	0	0.4299	0.8534	0.9329	1.194	0.9852	1.6706	0	0.0589	0	0	0	0.067	0	0.0216	1.0943	1.1643	0	0	0	0	0	0.4856	0	0.7051	0.234	0	0	0.4968	0.2615	0
